# Supplementary material for: Healthcare seeking among Swedish patients in opioid substitution treatment – a mixed methods study on barriers and facilitators
Source: PubMed Central journal article supplement (PMC8817477; doi:10.1186/s13011-022-00434-w), 2022-02-05
Supplement: 13011_2022_434_MOESM1_ESM.pdf [file 13011_2022_434_MOESM1_ESM.pdf]

## Appendix Section Q28-29

### Healthcare seeking, access and encounters with medical staff

28. Are you worried about, or troubled by, a matter concerning your physical health?

No

Yes if =Yes → 28a. What are you worried about or troubled by?

\_\_\_\_\_

28b. Have you sought healthcare for this matter?

Yes → What kind of healthcare?

\_\_\_\_\_

No → Why not?

\_\_\_\_\_

29. During the last year, did you ever refrain from healthcare seeking in spite of experiencing a need to do so?

No

Yes if =Yes →

29a. Why did you refrain from healthcare seeing in spite of a need to do so?

Recorded variable:  
"Deprioritizing"

- I did not prioritize the need as it, at the time, was more important to
  - Find roof over my head
  - Getting money
  - Getting drugs
  - Other reason: \_\_\_\_\_

- I was afraid to find out that I had a serious condition
- I was afraid of being treated badly
- Fear of being labelled a junky and not getting helped
- I was afraid not to understand

Recorded variable:  
"Resignation"

- It would not have mattered if I sought healthcare as I would not have been able to fulfil any treatment anyway as I...
  - Do not have money for medication, if prescribed
  - I would not have been able to follow doctors' recommendations
  - Other reason: \_\_\_\_\_

Recoded variable:  
"Tried without  
success"

- I did not know what number to call
- I did not know which primary care facility I was listed at (where to call)
- I did not have a phone (or money to call for)
- I called but...
  - There was a telephone queue and I did not have the patience to wait
  - There were no available appointments
  - I got an appointment, but missed it
  - Other reason: \_\_\_\_\_
